# Supplementary material for: Sexual Activity in Couples Dealing With Breast Cancer. A Cohort Study of Associations With Patient, Partner and Relationship-Related Factors
Source: PubMed Central journal article supplement (PMC9021795; doi:10.3389/fpsyg.2022.828422), 2022-04-07
Supplement: Data_Sheet_1.pdf [file Data_Sheet_1.pdf]

## *Supplementary Material*

**Table A. Associations between patients' and partners' relationship factors and sexual activity at baseline adjusting for the respective other partner's score, n=722**

|                                                             | OR <sub>crude</sub> | OR <sub>adj</sub> (95%-CI) <sup>a</sup> | OR <sub>SDadj</sub> (95%-CI) <sup>a</sup> |
|-------------------------------------------------------------|---------------------|-----------------------------------------|-------------------------------------------|
| <b>PATIENT</b>                                              |                     |                                         |                                           |
| <b>Relationship factors</b>                                 |                     |                                         |                                           |
| Satisfaction with dyadic coping <sup>b</sup>                | 1.19***             | 1.16 (1.06, 1.27)**                     | 1.33 (1.12, 1.57)**                       |
| Emotional closeness <sup>b</sup>                            | 1.75***             | 1.61 (1.29, 2.01)***                    | 1.46 (1.23, 1.75)***                      |
| Affectionate behavior (ref. infrequent (<3)): frequent (≥3) | 3.00***             | 1.90 (1.24, 2.91)**                     | 1.90 (1.24, 2.91)**                       |
| <b>PARTNER</b>                                              |                     |                                         |                                           |
| <b>Relationship factors</b>                                 |                     |                                         |                                           |
| Satisfaction with dyadic coping <sup>b</sup>                | 1.13**              | 1.12 (1.03, 1.23)**                     | 1.24 (1.06, 1.48)**                       |
| Emotional closeness <sup>b</sup>                            | 1.69***             | 1.57 (1.24, 1.98)***                    | 1.43 (1.19, 1.72)***                      |
| Affectionate behavior (ref. infrequent (<3)): frequent (≥3) | 3.49***             | 2.69 (1.76, 4.11)***                    | 2.69 (1.76, 4.11)***                      |

Abbreviations: OR, Odds Ratio; OR<sub>SD</sub>, Odds Ratio measured in units of sample SD for continuous covariates

<sup>a</sup>Adjusted for patient age, type of surgery, chemotherapy and the respective other partner's covariate

<sup>b</sup>Per scale unit (resp. SD) increase

\*p<0.05, \*\*p<0.01, \*\*\*p<0.001

**Table B. Associations between patients' and partners' relationship factors and sexual activity at time T2, adjusting for the respective other partner's score and stratified on sexual activity at baseline, n=533**

|                                                             | Couples not sexually active at time T1, n=210 |                                         |                                           | Couples sexually active at time T1, n=323 |                                         |                                           |
|-------------------------------------------------------------|-----------------------------------------------|-----------------------------------------|-------------------------------------------|-------------------------------------------|-----------------------------------------|-------------------------------------------|
|                                                             | OR <sub>crude</sub>                           | OR <sub>adj</sub> (95%-CI) <sup>a</sup> | OR <sub>SDadj</sub> (95%-CI) <sup>a</sup> | OR <sub>crude</sub>                       | OR <sub>adj</sub> (95%-CI) <sup>a</sup> | OR <sub>SDadj</sub> (95%-CI) <sup>a</sup> |
| <b>PATIENT</b>                                              |                                               |                                         |                                           |                                           |                                         |                                           |
| <b>Relationship-related factors</b>                         |                                               |                                         |                                           |                                           |                                         |                                           |
| Satisfaction with dyadic coping <sup>b</sup>                | 1.14                                          | 1.14 (0.96, 1.37)                       | 1.33 (0.91, 2.00)                         | 1.28*                                     | 1.16 (0.93, 1.46)                       | 1.29 (0.88, 1.90)                         |
| Emotional closeness <sup>b</sup>                            | 1.07                                          | 0.94 (0.61, 1.46)                       | 0.95 (0.64, 1.41)                         | 2.01**                                    | 1.75 (1.08, 2.86)*                      | 1.48 (1.06, 2.09)*                        |
| Affectionate behavior (ref. infrequent (<3)): frequent (≥3) | 1.62                                          | 1.37 (0.62, 3.33)                       | 1.37 (0.62, 3.33)                         | 6.48***                                   | 5.52 (2.15, 14.14)***                   | 5.52 (2.15, 14.14)***                     |
| <b>PARTNER</b>                                              |                                               |                                         |                                           |                                           |                                         |                                           |
| <b>Relationship-related factors</b>                         |                                               |                                         |                                           |                                           |                                         |                                           |
| Satisfaction with dyadic coping <sup>b</sup>                | 1.11                                          | 1.10 (0.92, 1.32)                       | 1.22 (0.84, 1.79)                         | 1.39***                                   | 1.36 (1.12, 1.65)**                     | 1.69 (1.21, 2.34)**                       |
| Emotional closeness <sup>b</sup>                            | 1.45                                          | 1.64 (1.01, 2.67)*                      | 1.64 (1.01, 2.67)*                        | 1.93**                                    | 1.54 (0.91, 2.59)                       | 1.30 (0.95, 1.77)                         |
| Affectionate behavior (ref. infrequent (<3)): frequent (≥3) | 2.05*                                         | 2.09 (0.97, 4.52)                       | 2.09 (0.97, 4.52)                         | 3.69**                                    | 1.53 (0.56, 4.16)                       | 1.53 (0.56, 4.16)                         |

Abbreviations: OR, Odds Ratio; OR<sub>SD</sub>, Odds Ratio measured in units of sample SD for continuous covariates

<sup>a</sup>Adjusted for patient age, type of surgery, chemotherapy and the respective other partner's covariate

<sup>b</sup>Per scale unit (resp. SD) increase

\*p<0.05, \*\*p<0.01, \*\*\*p<0.001

**Table C. Associations between patients' and partners' relationship factors and sexual activity at time T3, adjusting for the respective other partner's score and stratified on sexual activity at time T1, n=471**

|                                                             | Couples not sexually active at time T1, n=181 |                                         |                                           | Couples sexually active at time T1, n=290 |                                         |                                           |
|-------------------------------------------------------------|-----------------------------------------------|-----------------------------------------|-------------------------------------------|-------------------------------------------|-----------------------------------------|-------------------------------------------|
|                                                             | OR <sub>crude</sub>                           | OR <sub>adj</sub> (95%-CI) <sup>a</sup> | OR <sub>SDadj</sub> (95%-CI) <sup>a</sup> | OR <sub>crude</sub>                       | OR <sub>adj</sub> (95%-CI) <sup>a</sup> | OR <sub>SDadj</sub> (95%-CI) <sup>a</sup> |
| <b>PATIENT</b>                                              |                                               |                                         |                                           |                                           |                                         |                                           |
| <b>Relationship-related factors</b>                         |                                               |                                         |                                           |                                           |                                         |                                           |
| Satisfaction with dyadic coping <sup>b</sup>                | 1.03                                          | 0.97 (0.82, 1.14)                       | 0.94 (0.65, 1.33)                         | 1.32*                                     | 1.22 (0.92, 1.62)                       | 1.40 (0.87, 2.27)                         |
| Emotional closeness <sup>b</sup>                            | 1.12                                          | 1.02 (0.68, 1.52)                       | 1.02 (0.71, 1.46)                         | 1.53                                      | 1.22 (0.70, 2.14)                       | 1.15 (0.78, 1.70)                         |
| Affectionate behavior (ref. infrequent (<3)): frequent (≥3) | 1.47                                          | 1.06 (0.49, 2.31)                       | 1.06 (0.49, 2.31)                         | 4.69**                                    | 3.15 (1.03, 9.65)*                      | 3.15 (1.03, 9.65)*                        |
| <b>PARTNER</b>                                              |                                               |                                         |                                           |                                           |                                         |                                           |
| <b>Relationship-related factors</b>                         |                                               |                                         |                                           |                                           |                                         |                                           |
| Satisfaction with dyadic coping <sup>b</sup>                | 1.14                                          | 1.17 (0.98, 1.40)                       | 1.39 (0.96, 2.02)                         | 1.37**                                    | 1.32 (1.06, 1.65)*                      | 1.60 (1.10, 2.34)*                        |
| Emotional closeness <sup>b</sup>                            | 1.27                                          | 1.29 (0.83, 1.99)                       | 1.29 (0.83, 1.99)                         | 2.08**                                    | 1.94 (1.10, 3.43)*                      | 1.49 (1.06, 2.09)*                        |
| Affectionate behavior (ref. infrequent (<3)): frequent (≥3) | 1.98*                                         | 1.97 (0.93, 4.17)                       | 1.97 (0.93, 4.17)                         | 4.37**                                    | 2.23 (0.12, 331.67)                     | 2.23 (0.12, 331.67)                       |

Abbreviations: OR, Odds Ratio; OR<sub>SD</sub>, Odds Ratio measured in units of sample SD for continuous covariates

<sup>a</sup>Adjusted for patient age, type of surgery, chemotherapy and the respective other partner's covariate

<sup>b</sup>Per scale unit (resp. SD) increase

\*p<0.05, \*\*p<0.01
